# Supplementary material for: South Marsh Island Block 128 field, offshore Louisiana
Source: Springer Nature journal article supplement (doi:10.1186/s12985-022-01904-0), 1989-03-01
Supplement: MOESM1 [file 23646774]

**Additional file 1: Clinical specimens used to evaluate the TKK 2<sup>nd</sup> kit.**

| Sample ID      | Collection date | Ct value | PFU/ml   | Serotype | Genotype     | DENV IgM | DENV IgG | Color intensity of the TKK 2 <sup>nd</sup> kit (mAbs) | Color intensity of SD Bioline RDT (mAbs) |
|----------------|-----------------|----------|----------|----------|--------------|----------|----------|-------------------------------------------------------|------------------------------------------|
| DV1I-TM18-20   | 28-May-18       | 18.00    | 1.39E+06 | 1        | I            | NA       | NA       | 863.9                                                 | NA                                       |
| DV1I-TM19-70   | 23-Dec-19       | 15.38    | 3.99E+06 | 1        | I            | NA       | NA       | 854.1                                                 | NA                                       |
| DV1I-TM19-40   | 29-Nov-19       | 15.79    | 3.92E+06 | 1        | I            | NA       | NA       | 635.2                                                 | NA                                       |
| DV1I-TM19-52   | 10-Dec-19       | 19.06    | 5.19E+05 | 1        | I            | NA       | NA       | 644.9                                                 | NA                                       |
| DV1I-TM19-75   | 28-Dec-19       | 19.29    | 4.56E+05 | 1        | I            | NA       | NA       | 894.0                                                 | NA                                       |
| DV1I-TM19-24   | 22-Nov-19       | 20.04    | 2.73E+05 | 1        | I            | NA       | NA       | 288.9                                                 | NA                                       |
| DV1I-TM20-21   | 16-Feb-20       | 17.24    | 1.66E+06 | 1        | I            | Negative | Negative | 207.2                                                 | NA                                       |
| DV1I-TM20-47   | 19-Aug-20       | 17.89    | 1.11E+06 | 1        | I            | NA       | NA       | 510.4                                                 | NA                                       |
| DV1I-TM20-24   | 27-Jun-20       | 18.49    | 7.66E+05 | 1        | I            | NA       | NA       | 278.8                                                 | NA                                       |
| DV1I-TM20-25   | 5-Jul-20        | 19.95    | 3.10E+05 | 1        | I            | NA       | NA       | 123.6                                                 | NA                                       |
| DV2C-TM19-37   | 28-Nov-19       | 15.84    | 3.79E+06 | 2        | Cosmopolitan | NA       | NA       | 921.0                                                 | NA                                       |
| DV2A-TM19-13   | 19-Nov-19       | 17.70    | 1.18E+06 | 2        | Asian I      | NA       | NA       | 944.4                                                 | NA                                       |
| DV2C-TM19-41   | 30-Nov-19       | 18.67    | 6.42E+05 | 2        | Cosmopolitan | NA       | NA       | 768.7                                                 | NA                                       |
| DV2C-TM19-32   | 26-Nov-19       | 19.23    | 4.52E+05 | 2        | Cosmopolitan | NA       | NA       | 625.6                                                 | NA                                       |
| DV2C-TM19-31   | 26-Nov-19       | 19.68    | 3.40E+05 | 2        | Cosmopolitan | NA       | NA       | 600.9                                                 | NA                                       |
| DV2A-TM19-43   | 3-Dec-19        | 22.74    | 6.72E+04 | 2        | Asian I      | NA       | NA       | 830.7                                                 | NA                                       |
| DV2A-TM20-96   | 3-Nov-20        | 16.57    | 3.39E+06 | 2        | Asian I      | NA       | NA       | 870.4                                                 | NA                                       |
| DV2A-TM20-94   | 30-Oct-20       | 18.88    | 1.02E+06 | 2        | Asian I      | NA       | NA       | 284.2                                                 | NA                                       |
| DV2C-TM20-65   | 22-Sep-20       | 18.14    | 1.50E+06 | 2        | Cosmopolitan | NA       | NA       | 809.5                                                 | NA                                       |
| DV2C-TM20-36   | 3-Aug-20        | 18.61    | 7.10E+05 | 2        | Cosmopolitan | NA       | NA       | 801.8                                                 | NA                                       |
| DV3I-TM20-10   | 11-Jan-20       | 20.02    | 2.98E+05 | 3        | I            | NA       | NA       | 431.9                                                 | NA                                       |
| DV3I-TM20-02   | 2-Jan-20        | 21.44    | 1.24E+05 | 3        | I            | NA       | NA       | 242.1                                                 | NA                                       |
| DV3III-TM20-07 | 10-Jan-20       | 23.45    | 3.58E+04 | 3        | III          | NA       | NA       | 326.5                                                 | NA                                       |
| DV3I-TM20-09   | 11-Jan-20       | 27.05    | 3.86E+03 | 3        | I            | NA       | NA       | 30.0                                                  | NA                                       |
| DV4I-TM20-76   | 3-Oct-20        | 28.80    | 2.34E+03 | 4        | I            | NA       | NA       | 453.7                                                 | NA                                       |
| DV4I-TM18-7    | 27-Mar-18       | 22.82    | 1.20E+05 | 4        | I            | NA       | NA       | 790.1                                                 | NA                                       |
| DV4I-TM20-90   | 21-Oct-20       | 19.21    | 8.60E+05 | 4        | I            | Negative | Negative | 959.2                                                 | NA                                       |
| DV4I-TM20-41   | 14-Aug-20       | 19.54    | 4.00E+05 | 4        | I            | Negative | Positive | 885.3                                                 | NA                                       |
| DV4I-TM20-69   | 28-Sep-20       | 19.61    | 6.99E+05 | 4        | I            | NA       | NA       | 1000.7                                                | NA                                       |
| DV4I-TM20-64   | 18-Sep-20       | 20.03    | 5.63E+05 | 4        | I            | Negative | Positive | 718.3                                                 | NA                                       |
| DV4I-TM20-59   | 11-Sep-20       | 24.11    | 6.76E+04 | 4        | I            | NA       | NA       | 334.9                                                 | NA                                       |
| DV4I-TM20-98   | 9-Nov-20        | 26.01    | 2.52E+04 | 4        | I            | Negative | Positive | 993.3                                                 | NA                                       |
| DV4I-TM20-53   | 29-Aug-20       | 26.27    | 2.20E+04 | 4        | I            | Positive | Positive | 961.9                                                 | NA                                       |
| DV4I-TM20-5    | 9-Jan-20        | 27.23    | 3.46E+03 | 4        | I            | NA       | NA       | 536.5                                                 | NA                                       |
| DV4I-TM20-27   | 11-Jul-20       | 23.60    | 3.25E+04 | 4        | I            | Negative | Positive | 884.4                                                 | 255.1                                    |
| DV4I-TM20-28   | 13-Jul-20       | 23.96    | 2.61E+04 | 4        | I            | Negative | Negative | 694.8                                                 | 201.0                                    |
| DV4I-TM20-34   | 2-Aug-20        | 28.60    | 1.49E+03 | 4        | I            | Negative | Negative | 461.9                                                 | 99.1                                     |
| DV4I-TM20-76   | 3-Oct-20        | 31.66    | 1.34E+03 | 4        | I            | Positive | Positive | 583.2                                                 | 55.4                                     |
| DV4I-TM18-77   | 11-Oct-18       | 26.99    | 1.45E+04 | 4        | I            | Negative | Negative | 945.4                                                 | 352.8                                    |
| DV4I-TM18-48   | 14-Aug-18       | 29.93    | 3.27E+03 | 4        | I            | Negative | Positive | 901.9                                                 | 209.8                                    |
| ZK-17          | NA              | 28.21    | NA       | NA       | NA           | NA       | NA       | 6.5                                                   | NA                                       |
| ZK-19          | NA              | 25.19    | NA       | NA       | NA           | NA       | NA       | 0                                                     | NA                                       |
| ZK-20          | NA              | 28.09    | NA       | NA       | NA           | NA       | NA       | 0                                                     | NA                                       |
| ZK-24          | NA              | 28.08    | NA       | NA       | NA           | NA       | NA       | 0                                                     | NA                                       |
| ZK-31          | NA              | 34.23    | NA       | NA       | NA           | NA       | NA       | 0                                                     | NA                                       |
| ZK-32          | NA              | 28.10    | NA       | NA       | NA           | NA       | NA       | 0                                                     | NA                                       |
| ZK-36          | NA              | 28.32    | NA       | NA       | NA           | NA       | NA       | 0                                                     | NA                                       |
| ZK-38          | NA              | 28.08    | NA       | NA       | NA           | NA       | NA       | 0                                                     | NA                                       |
| ZK-39          | NA              | 26.28    | NA       | NA       | NA           | NA       | NA       | 0                                                     | NA                                       |
| ZK-47          | NA              | 29.40    | NA       | NA       | NA           | NA       | NA       | 0                                                     | NA                                       |

NA; Data not available
