# Supplementary material for: South Marsh Island Block 128 field, offshore Louisiana
Source: Springer Nature journal article supplement (doi:10.1186/s12985-022-01904-0), 1989-03-01
Supplement: MOESM3 [file 23646774]

**Additional file 3:** The performance of TKK<sup>2nd</sup> kit in serum specimens of DENV-positive participants with a range of different time points during the infection

| Defervescence date | Project ID | Collection date | TKK 2nd kit     |                                                                                      |
|--------------------|------------|-----------------|-----------------|--------------------------------------------------------------------------------------|
| Day 6              | BKK-002    | Day 1           | ++ <sup>a</sup> | 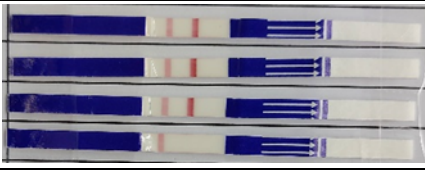   |
|                    |            | Day 2           | ++              |                                                                                      |
|                    |            | Day 4           | ++              |                                                                                      |
|                    |            | Day 6           | - <sup>b</sup>  |                                                                                      |
| Day 5              | BKK-003    | Day 1           | ++              |    |
|                    |            | Day 3           | + <sup>c</sup>  |                                                                                      |
|                    |            | Day 4           | -               |                                                                                      |
|                    |            | Day 5           | -               |                                                                                      |
|                    |            | Day 7           | -               |                                                                                      |
| Day 3              | BKK-004    | Day 1           | ++              |    |
|                    |            | Day 2           | ++              |                                                                                      |
|                    |            | Day 5           | -               |                                                                                      |
|                    |            | Day 17          | -               |                                                                                      |
| Day 2              | BKK-005    | Day 1           | ++              |   |
|                    |            | Day 2           | ++              |                                                                                      |
|                    |            | Day 3           | ++              |                                                                                      |
| Day 2              | BKK-006    | Day 1           | ++              |  |
|                    |            | Day 3           | -               |                                                                                      |
|                    |            | Day 4           | -               |                                                                                      |
|                    |            | Day 6           | -               |                                                                                      |
| Day 5              | BKK-008    | Day 1           | ++              |  |
|                    |            | Day 3           | ++              |                                                                                      |

a; The test band intensity was stronger than the control band intensity.

b; No visible test band appeared.

c; The test band intensity was equivalent to or weaker than the control band intensity.
